# Supplementary material
Source: PubMed Central journal article supplement (PMC5672832)
Supplement: NIHMS869521-supplement-1.pdf [file NIHMS869521-supplement-1.pdf]

| File Name                                    | Description                                                                                                             | Format | Size     |
|----------------------------------------------|-------------------------------------------------------------------------------------------------------------------------|--------|----------|
| Supplementary Materials.pdf                  | Supplementary Notes;<br>Supplementary<br>Methods;<br>Supplementary Tables<br>2-9; Supplementary<br>Figures 1-24, 28-32; | pdf    | 7,531 Kb |
| Table_S1.xlsx                                | Supplementary Table 1                                                                                                   | xlsx   | 27 Kb    |
| Fig25_GTE <sub>x</sub> _FADS1.pdf            | Supplementary Figure 25                                                                                                 | pdf    | 1,973 Kb |
| Fig26_GTE <sub>x</sub> _FADS2.pdf            | Supplementary Figure 26                                                                                                 | pdf    | 2,033 Kb |
| Fig27_GTE <sub>x</sub> _FADS3.pdf            | Supplementary Figure 27                                                                                                 | pdf    | 1,928 Kb |
| Supplementary_Data_Computational_Scripts.zip | Supplementary Data 1                                                                                                    | zip    | 232 Kb   |
